# Supplementary material for: A Population Genetics-Phylogenetics Approach to Inferring Natural Selection in Coding Sequences
Source: PLOS journal article supplement (doi:10.1371/journal.pgen.1002395), 2011-12-01

**A***D. melanogaster*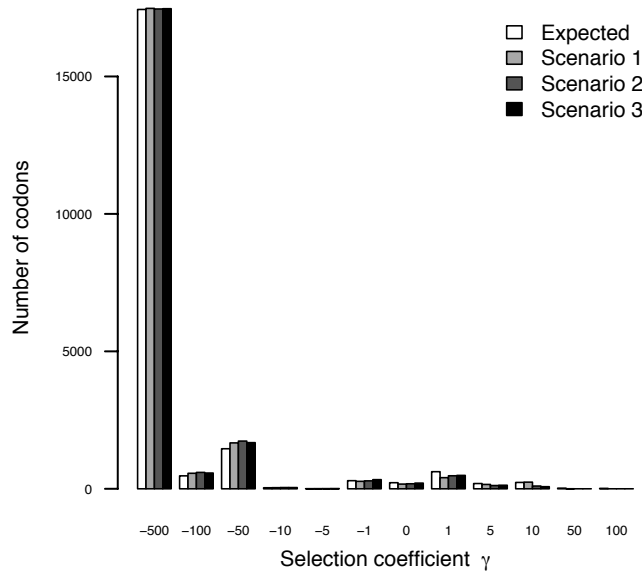**B***D. simulans*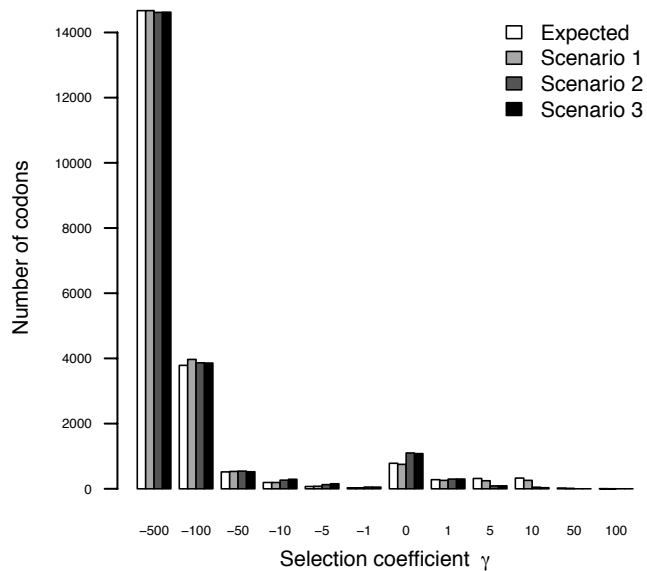

Supplement: S6 (10.1371/journal.pgen.1002395.s006) [file journal.pgen.1002395.s006.pdf › journal.pgen.1002395.s006.pdf]
