# Supplementary material for: A Population Genetics-Phylogenetics Approach to Inferring Natural Selection in Coding Sequences
Source: PLOS journal article supplement (doi:10.1371/journal.pgen.1002395), 2011-12-01

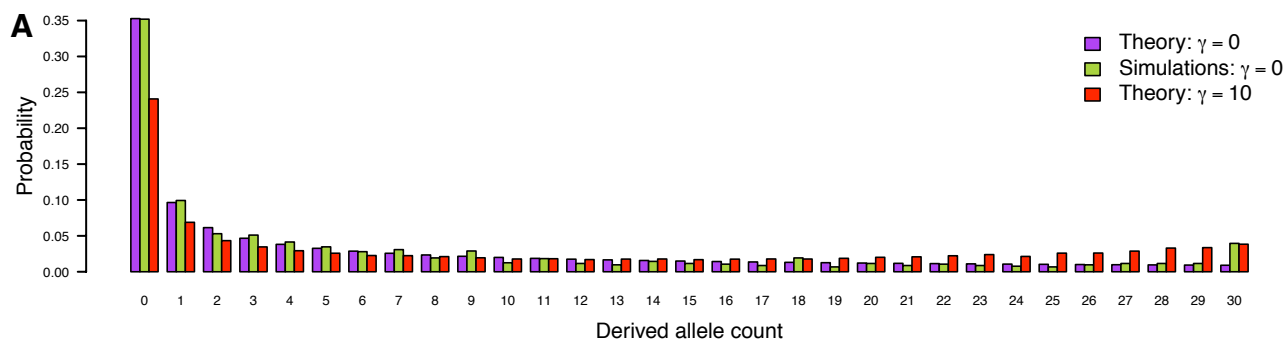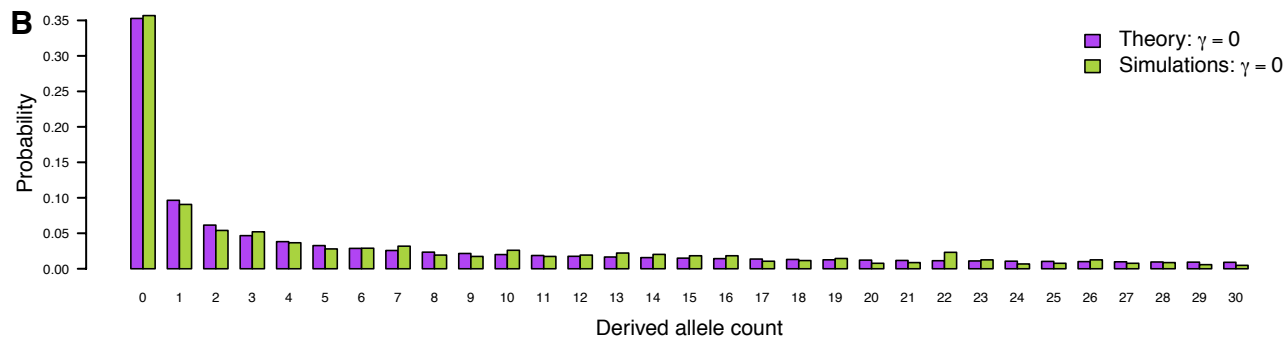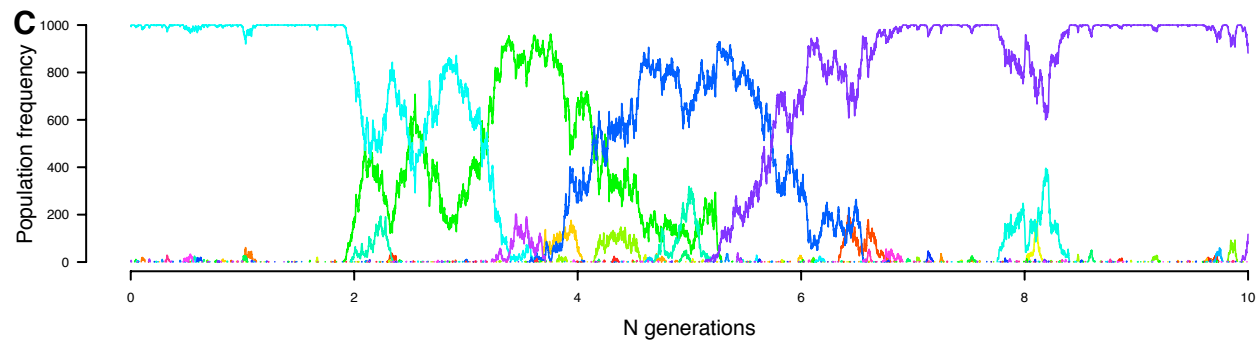

Supplement: S8 (10.1371/journal.pgen.1002395.s008) [file journal.pgen.1002395.s008.pdf › journal.pgen.1002395.s008.pdf]
