# Supplementary material for: A Population Genetics-Phylogenetics Approach to Inferring Natural Selection in Coding Sequences
Source: PLOS journal article supplement (doi:10.1371/journal.pgen.1002395), 2011-12-01

**A**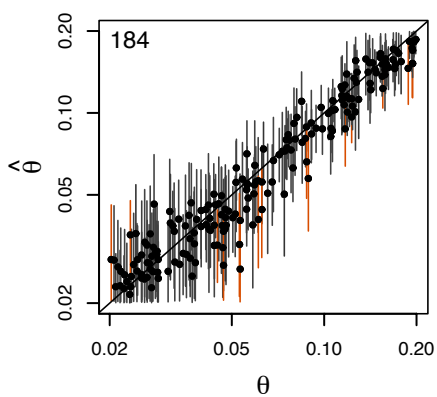

Population Genetic Model

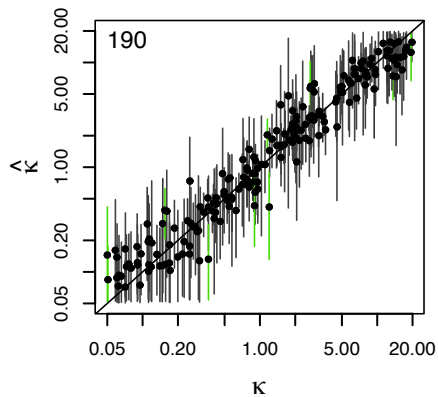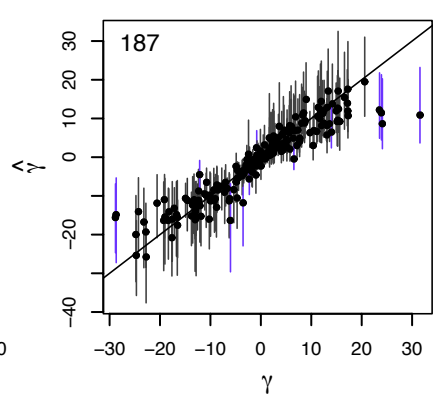**B**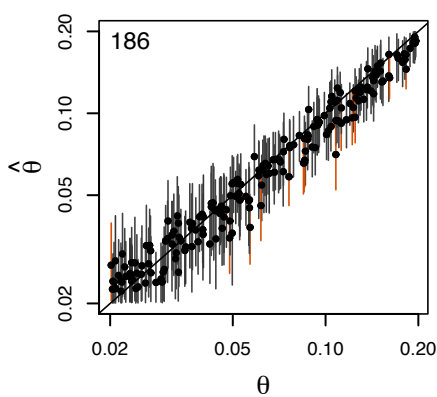

Population and Phylogenetic Model

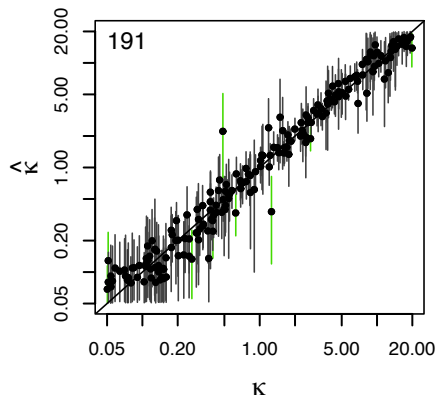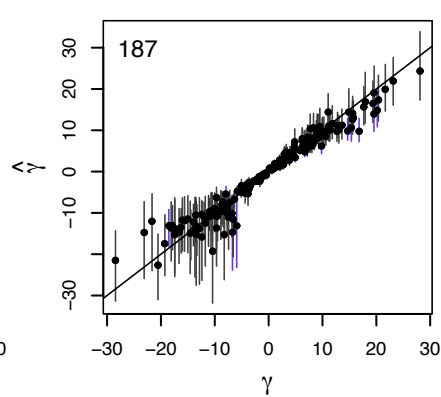

Supplement: S9 (10.1371/journal.pgen.1002395.s009) [file journal.pgen.1002395.s009.pdf › journal.pgen.1002395.s009.pdf]
