# Supplementary material for: A Population Genetics-Phylogenetics Approach to Inferring Natural Selection in Coding Sequences
Source: PLOS journal article supplement (doi:10.1371/journal.pgen.1002395), 2011-12-01
Supplement: S10 (10.1371/journal.pgen.1002395.s010) [file journal.pgen.1002395.s010.pdf › journal.pgen.1002395.s010.pdf]

## Text S1: Deriving the Multiallelic Hot-or-Not Model

The greatest difficulty in applying the Wright-Dirichlet distribution to data analysis is computing the normalization constant. Various methods are available, including importance sampling and Taylor series expansion [1]. In a multiallelic PIMS model of directional selection with no dominance, the Wright-Dirichlet distribution simplifies to

$$p(\mathbf{f}) \propto \prod_{i=1}^K e^{\gamma_i f_i} f_i^{\theta_i - 1}, \quad (\text{A1})$$

where  $\gamma_i$  is the population-scaled selection coefficient for allele  $i$ . The normalizing constant for this distribution is related to the characteristic function for a Dirichlet distribution with parameter  $\boldsymbol{\theta}$ . In addition to the methods mentioned above, it can be computed numerically using contour integration in the complex plane [2, 3]

$$\int_{\Phi_K} \prod_{i=1}^K e^{\gamma_i f_i} f_i^{\theta_i - 1} d\mathbf{f} = \frac{\prod_{i=1}^K \Gamma(\theta_i)}{2\pi I} \int_L e^t \prod_{i=1}^K (t - \gamma_i)^{-\theta_i} dt, \quad (\text{A2})$$

where  $I$  represents the imaginary unit and  $\Phi_K$  is a  $(K - 1)$ -simplex. The contour  $L$  is a loop beginning and ending at  $-\infty$ , and encircling in the positive direction (anticlockwise when the  $x$  and  $y$  axes correspond to the real and imaginary lines respectively) all the finite singularities of the integrand (*i.e.* when  $t = \gamma_i$ ). We have *Mathematica* code that performs this integration (available on request) but found it to be numerically unstable.

Under the hot-or-not model, however, we can use Equation A2 to show that

$$p(\mathbf{f}) = \frac{e^{\gamma F} \prod_{i=1}^K f_i^{\theta_i - 1}}{B(\boldsymbol{\theta})_1 F_1(\boldsymbol{\Theta}_H, \boldsymbol{\Theta}, \boldsymbol{\gamma})}, \quad (\text{A3})$$

where  $\gamma$  is the population-scaled selective difference between fitness classes,  $F$  is the total frequency of alleles in the favored (hot) fitness class,  $\Theta_H$  is the total mutation rate to alleles of that class and  $\Theta$  is the total mutation rate for all alleles.  $B(\boldsymbol{\theta})$  is the beta function with vector argument, so that

$$B(\boldsymbol{\theta}) = \prod_{i=1}^K \Gamma(\theta_i) / \Gamma\left(\sum_{i=1}^K \theta_i\right), \quad (\text{A4})$$

and  ${}_1F_1(a, b, c)$  is the confluent hypergeometric function.

Let  $\mathcal{H}$  be the set of favored alleles, and  $\mathcal{N}$  the set of disfavored alleles. The numbers of alleles in the two classes are  $K_H$  and  $K_N$ . Define  $\mathbf{h} = \{f_i / F : i \in \mathcal{H}\}$ ,  $\mathbf{g} = \{f_i / (1 - F) : i \in \mathcal{N}\}$ ,  $\boldsymbol{\theta}^{(H)} = \{\theta_i : i \in \mathcal{H}\}$  and  $\boldsymbol{\theta}^{(N)} = \{\theta_i : i \in \mathcal{N}\}$ . By making the change of variables  $(\mathbf{f}) \rightarrow (F, \mathbf{g}, \mathbf{h})$ , Equation A3 can be factorized so that

$$p(F, \mathbf{g}, \mathbf{h}) = \left[ \frac{e^{\gamma F} F^{\Theta_H - 1} (1 - F)^{\Theta_N - 1}}{B(\Theta_H, \Theta_N) {}_1F_1(\Theta_H, \Theta, \gamma)} \right] \times \left[ \frac{1}{B(\boldsymbol{\theta}^{(N)})} \prod_{i=1}^{K_N} g_i^{\theta_i^{(N)} - 1} \right] \left[ \frac{1}{B(\boldsymbol{\theta}^{(H)})} \prod_{i=1}^{K_H} h_i^{\theta_i^{(H)} - 1} \right], \quad (\text{A5})$$

where  $\Theta_N = \Theta - \Theta_H$ . This demonstrates that  $F$  follows a biallelic Wright-Dirichlet distribution with parameters  $(\Theta_H, \Theta_N, \gamma)$ , and  $\mathbf{g}$  and  $\mathbf{h}$  follow independent Dirichlet distributions with parameters  $\boldsymbol{\theta}^{(N)}$  and  $\boldsymbol{\theta}^{(H)}$  respectively. The Dirichlet distribution arises from the neutral case, and this factorization suggests that in a hot-or-not model, evolution within class  $\mathcal{H}$  or  $\mathcal{N}$  can be characterized as neutral. This in turn supports our assumption (see main text) that, in the low-mutation limit, the probability of fixation of

allele  $A$  equals the fixation probability for the whole class multiplied by the neutral fixation probability for allele  $A$  within its class.

To condition the stationary distribution on identity of the ancestral allele, suppose allele  $A$  is ancestral. In a recurrent selection model, the ancestral allele is disfavored. Thus from Equations A5 and the form of Equation 11 where  $A$  is disfavored,

$$\begin{aligned}
 p(F, \mathbf{g}, \mathbf{h} | A) &= \frac{(1 - e^{-\gamma(1-F)}) F^{\Theta_H-1} (1-F)^{\Theta_N-1} g_A \prod_{i=1}^{K_N} g_i^{\theta_i^{(N)}-1} \prod_{i=1}^{K_H} h_i^{\theta_i^{(H)}-1}}{\int_0^1 (1 - e^{-\varphi(1-F)}) \varphi^{\Theta_H-1} (1-\varphi)^{\Theta_N-1} d\varphi \int_{\Phi_{K_N}} \zeta_A \prod_{i=1}^{K_N} \zeta_i^{\theta_i^{(N)}-1} d\zeta \int_{\Phi_{K_H}} \prod_{i=1}^{K_H} \eta_i^{\theta_i^{(H)}-1} d\eta} \\
 &= \frac{(1 - e^{-\gamma(1-F)}) F^{\Theta_H-1} (1-F)^{\Theta_N-1} g_A \prod_{i=1}^{K_N} g_i^{\theta_i^{(N)}-1} \prod_{i=1}^{K_H} h_i^{\theta_i^{(H)}-1}}{\mathbf{B}(\Theta_H, \Theta_N) [1 - {}_1F_1(\Theta_N, \Theta, -\gamma)] \frac{\theta_A}{\Theta_N} \mathbf{B}(\boldsymbol{\theta}^{(N)}) \mathbf{B}(\boldsymbol{\theta}^{(H)})}.
 \end{aligned} \tag{A6}$$

Reversing the change-of-variables,

$$p(\mathbf{f} | A) = \frac{f_A}{1-F} \frac{\Theta_N}{\theta_A} \frac{(1 - e^{-\gamma(1-F)}) \prod_{i=1}^K f_i^{\theta_i-1}}{\mathbf{B}(\boldsymbol{\theta}) [1 - {}_1F_1(\Theta_N, \Theta, -\gamma)]}. \tag{A7}$$

Assuming that alleles are sampled at random with replacement from the population, we can utilize the multinomial distribution to obtain the conditional likelihood for a sample of size  $n$  comprising  $x_i$  copies of allele  $i$ , given that the ancestral allele is  $A$ .

$$\begin{aligned}
 p(\mathbf{x} | A) &= \int_{\Phi_K} \binom{n}{\mathbf{x}} \prod_{i=1}^K f_i^{x_i} p(\mathbf{f} | A) d\mathbf{f} \\
 &= \binom{n}{\mathbf{x}} \frac{(x_A + \theta_A) \Theta_N}{\theta_A (X_N + \Theta_N)} \frac{\mathbf{B}(\mathbf{x} + \boldsymbol{\theta})}{\mathbf{B}(\boldsymbol{\theta})} \frac{[1 - {}_1F_1(X_N + \Theta_N, n + \Theta, -\gamma)]}{[1 - {}_1F_1(\Theta_N, \Theta, -\gamma)]},
 \end{aligned} \tag{A8}$$

where  $X_N$  is the number of alleles sampled in class  $\mathcal{N}$  and  $\binom{n}{\mathbf{x}} = n! \prod_{i=1}^K \frac{1}{x_i!}$ . Note that

Equations A7 and A8 are equivalent to Equations 12 and 13 in the main text, using the identities  $F_A = 1 - F$ ,  $X_A = X_N$ , and  $\Theta_A = \Theta_N$ .

## References

1. Donnelly P, Nordborg M, Joyce P (2001) Likelihoods and simulation methods for a class of nonneutral population genetics models. *Genetics* 159: 853-867.
2. Erdélyi A (1939) Integration of certain systems of linear partial differential equations of hypergeometric type. *Proc Roy Soc Edin A* 59: 224-241.
3. Phillips PCB (1988) The characteristic function of the Dirichlet and multivariate F distributions. Cowles Foundation Discussion Paper No. 865.
